# Supplementary material
Source: Springer Nature journal article supplement (https://www.springermedizin.de/resource/supplementary/12985_2010_1094_MOESM6_ESM.pdf/9609128)

RRV

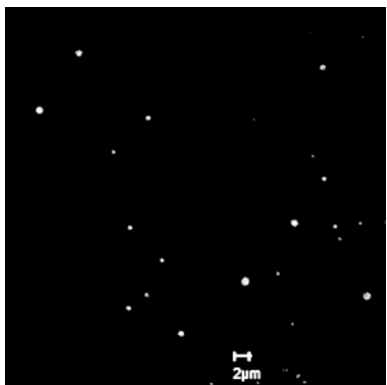

CY5 RRV

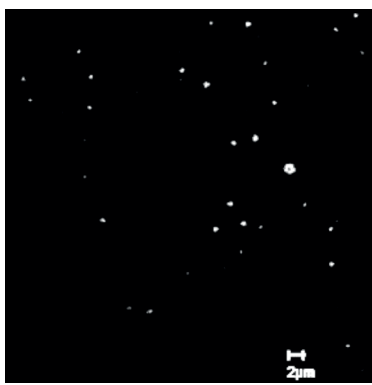

viroplasms

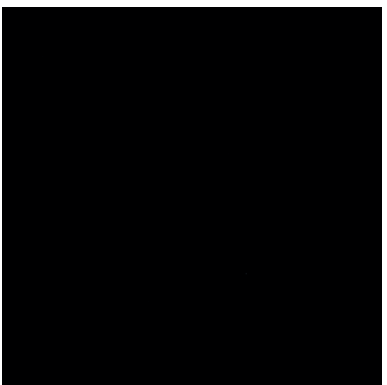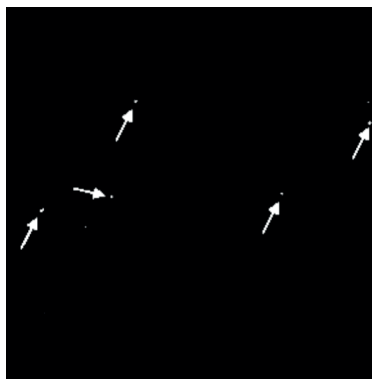

virus

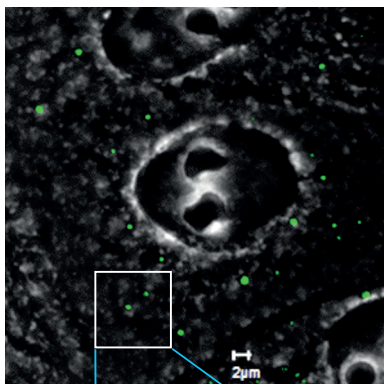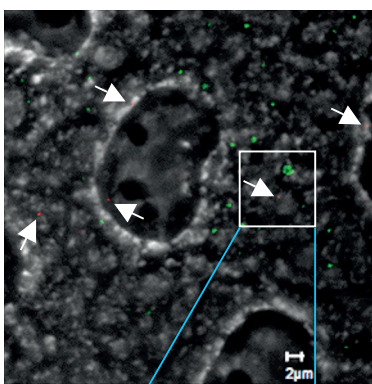

merge

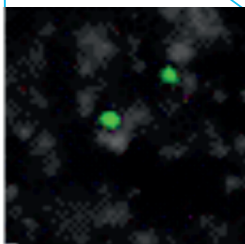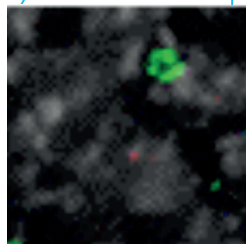

Supplement: MOESM6 [file 9609128]
